# Supplementary material for: Effect of Helicobacter pylori on gastrointestinal microbiota: a population-based study in Linqu, a high-risk area of gastric cancer
Source: PubMed Central journal article supplement — Gut. 2019 Dec 19;69(9):1598–607. doi: 10.1136/gutjnl-2019-319696 (PMC7456744; doi:10.1136/gutjnl-2019-319696), 2019-12-19
Supplement: gutjnl-2019-319696supp001.pdf [file gutjnl-2019-319696supp001.pdf]

Supplementary table 1. Baseline characteristics of study participants

| Baseline characteristics                        | Anti- <i>H. pylori</i> treatment groups |                          |                       | <i>H. pylori</i> negative group |                       |                       |
|-------------------------------------------------|-----------------------------------------|--------------------------|-----------------------|---------------------------------|-----------------------|-----------------------|
|                                                 | Successful eradication<br>n=58          | Failed treatment<br>n=57 | <i>P</i> <sup>a</sup> | n=49                            | <i>P</i> <sup>b</sup> | <i>P</i> <sup>c</sup> |
| Age, years (Mean ± SD) <sup>d</sup>             | 56.6 ± 9.2                              | 56.2 ± 8.9               | 0.801                 | 55.4 ± 8.1                      | 0.447                 | 0.603                 |
| Gender (%) <sup>e</sup>                         |                                         |                          | 0.043                 |                                 | 0.260                 | 0.002                 |
| Male                                            | 30 (51.7%)                              | 40 (70.2%)               |                       | 20 (40.8%)                      |                       |                       |
| Female                                          | 28 (48.3%)                              | 17 (29.8%)               |                       | 29 (59.2%)                      |                       |                       |
| BMI, kg/m <sup>2</sup> (Mean ± SD) <sup>d</sup> | 26.3 ± 1.2                              | 26.2 ± 1.3               | 0.739                 | 23.5 ± 2.5                      | <0.001                | <0.001                |
| Smoking (%) <sup>e</sup>                        |                                         |                          | 0.720                 |                                 | 0.015                 | 0.035                 |
| No                                              | 41 (70.7%)                              | 42 (73.7%)               |                       | 44 (89.8%)                      |                       |                       |
| Yes                                             | 17 (29.3%)                              | 15 (26.3%)               |                       | 5 (10.2%)                       |                       |                       |
| Drinking (%) <sup>e</sup>                       |                                         |                          | 0.066                 |                                 | 0.354                 | 0.008                 |
| No                                              | 43 (74.1%)                              | 33 (57.9%)               |                       | 40 (81.6%)                      |                       |                       |
| Yes                                             | 15 (25.9%)                              | 24 (42.1%)               |                       | 9 (18.4%)                       |                       |                       |
| Antibiotics use (%) <sup>e</sup>                |                                         |                          | 0.467                 |                                 | 0.205                 | 0.055                 |
| No                                              | 47 (81%)                                | 43 (75.4%)               |                       | 44 (89.8%)                      |                       |                       |
| Yes                                             | 11 (19%)                                | 14 (24.6%)               |                       | 5 (10.2%)                       |                       |                       |
| Gastric lesions (%) <sup>f</sup>                |                                         |                          | 0.710                 |                                 | <0.001                | <0.001                |
| Normal/SG                                       | 5 (8.6%)                                | 4 (7.0%)                 |                       | 26 (53.1%)                      |                       |                       |
| CAG                                             | 25 (43.1%)                              | 19 (33.4%)               |                       | 9 (18.4%)                       |                       |                       |
| IM/DYS                                          | 28 (48.3%)                              | 30 (52.6%)               |                       | 13 (26.5%)                      |                       |                       |
| Missing                                         | 0 (0.0%)                                | 4 (7.0%)                 |                       | 1 (2.0%)                        |                       |                       |

<sup>a</sup>Successful eradication group v.s. failed treatment group

<sup>b</sup>Successful eradication group v.s. *H. pylori* negative group

<sup>c</sup>Failed treatment group v.s. *H. pylori* negative group

<sup>d</sup>*t*-test

<sup>e</sup> $\chi^2$  test

<sup>f</sup>Fisher's exact test

BMI, body mass index; CAG, chronic atrophic gastritis; DYS, dysplasia; *H. pylori*, *Helicobacter pylori*; IM, intestinal metaplasia; SG, superficial gastritis

Supplementary table 2. Significantly changed taxa after successful *H. pylori* eradication

| Level                   | Taxa <sup>a</sup>                      | Alteration trend after eradication | Mean relative abundance before eradication | Mean relative abundance after eradication | Fold change <sup>b</sup> | q value <sup>c</sup> |
|-------------------------|----------------------------------------|------------------------------------|--------------------------------------------|-------------------------------------------|--------------------------|----------------------|
| <b>Gastric biopsies</b> |                                        |                                    |                                            |                                           |                          |                      |
| Phylum                  | <i>p__Cyanobacteria/Chloroplast</i>    | ↑                                  | 0.99%                                      | 5.15%                                     | 5.18                     | 0.023                |
| Phylum                  | <i>p__Bacteroidetes</i>                | ↑                                  | 3.49%                                      | 17.83%                                    | 5.11                     | <0.001               |
| Phylum                  | <i>p__Fusobacteria</i>                 | ↑                                  | 0.82%                                      | 4.06%                                     | 4.98                     | <0.001               |
| Phylum                  | <i>p__Actinobacteria</i>               | ↑                                  | 1.21%                                      | 6.02%                                     | 4.95                     | <0.001               |
| Phylum                  | <i>p__Firmicutes</i>                   | ↑                                  | 6.81%                                      | 28.35%                                    | 4.16                     | <0.001               |
| Phylum                  | <i>p__unknown_Bacteria</i>             | ↑                                  | 2.17%                                      | 8.06%                                     | 3.71                     | <0.001               |
| Class                   | <i>c__Chloroplast</i>                  | ↑                                  | 0.96%                                      | 5.11%                                     | 5.30                     | 0.024                |
| Class                   | <i>c__Bacteroidia</i>                  | ↑                                  | 3.25%                                      | 16.73%                                    | 5.15                     | <0.001               |
| Class                   | <i>c__Fusobacteriia</i>                | ↑                                  | 0.82%                                      | 4.06%                                     | 4.98                     | <0.001               |
| Class                   | <i>c__Actinobacteria</i>               | ↑                                  | 1.21%                                      | 6.02%                                     | 4.95                     | <0.001               |
| Class                   | <i>c__Negativicutes</i>                | ↑                                  | 0.74%                                      | 3.6%                                      | 4.86                     | <0.001               |
| Class                   | <i>c__Clostridia</i>                   | ↑                                  | 1.04%                                      | 4.82%                                     | 4.65                     | <0.001               |
| Class                   | <i>c__Betaproteobacteria</i>           | ↑                                  | 2.03%                                      | 9.33%                                     | 4.59                     | <0.001               |
| Class                   | <i>c__Bacilli</i>                      | ↑                                  | 5.00%                                      | 19.76%                                    | 3.95                     | <0.001               |
| Class                   | <i>c__unknown_Bacteria</i>             | ↑                                  | 2.17%                                      | 8.06%                                     | 3.71                     | <0.001               |
| Class                   | <i>c__Gammaproteobacteria</i>          | ↑                                  | 3.96%                                      | 7.39%                                     | 1.87                     | 0.001                |
| Order                   | <i>o__Bacillales</i>                   | ↑                                  | 1.91%                                      | 12.37%                                    | 6.47                     | <0.001               |
| Order                   | <i>o__Chloroplast</i>                  | ↑                                  | 0.96%                                      | 5.11%                                     | 5.30                     | 0.024                |
| Order                   | <i>o__Bacteroidales</i>                | ↑                                  | 3.25%                                      | 16.73%                                    | 5.15                     | <0.001               |
| Order                   | <i>o__Actinomycetales</i>              | ↑                                  | 1.10%                                      | 5.60%                                     | 5.08                     | <0.001               |
| Order                   | <i>o__Fusobacteriales</i>              | ↑                                  | 0.82%                                      | 4.06%                                     | 4.98                     | <0.001               |
| Order                   | <i>o__Selenomonadales</i>              | ↑                                  | 0.74%                                      | 3.60%                                     | 4.86                     | <0.001               |
| Order                   | <i>o__Neisseriales</i>                 | ↑                                  | 1.79%                                      | 8.56%                                     | 4.78                     | <0.001               |
| Order                   | <i>o__Clostridiales</i>                | ↑                                  | 1.04%                                      | 4.82%                                     | 4.65                     | <0.001               |
| Order                   | <i>o__unknown_Bacteria</i>             | ↑                                  | 2.17%                                      | 8.06%                                     | 3.71                     | <0.001               |
| Order                   | <i>o__Pasteurellales</i>               | ↑                                  | 1.93%                                      | 5.23%                                     | 2.71                     | <0.001               |
| Order                   | <i>o__Lactobacillales</i>              | ↑                                  | 3.09%                                      | 7.40%                                     | 2.40                     | <0.001               |
| Family                  | <i>f__Staphylococcaceae</i>            | ↑                                  | 1.58%                                      | 10.99%                                    | 6.97                     | <0.001               |
| Family                  | <i>f__Corynebacteriaceae</i>           | ↑                                  | 0.38%                                      | 2.62%                                     | 6.83                     | <0.001               |
| Family                  | <i>f__Fusobacteriaceae</i>             | ↑                                  | 0.51%                                      | 3.34%                                     | 6.56                     | <0.001               |
| Family                  | <i>f__Bacteroidaceae</i>               | ↑                                  | 0.42%                                      | 2.28%                                     | 5.39                     | <0.001               |
| Family                  | <i>f__Chloroplast</i>                  | ↑                                  | 0.96%                                      | 5.11%                                     | 5.30                     | 0.024                |
| Family                  | <i>f__Porphyromonadaceae</i>           | ↑                                  | 0.58%                                      | 3.08%                                     | 5.30                     | <0.001               |
| Family                  | <i>f__Prevotellaceae</i>               | ↑                                  | 2.12%                                      | 11.06%                                    | 5.22                     | <0.001               |
| Family                  | <i>f__Lachnospiraceae</i>              | ↑                                  | 0.45%                                      | 2.32%                                     | 5.14                     | <0.001               |
| Family                  | <i>f__Bacillales_Incertae Sedis XI</i> | ↑                                  | 0.24%                                      | 1.18%                                     | 5.00                     | <0.001               |
| Family                  | <i>f__Neisseriaceae</i>                | ↑                                  | 1.79%                                      | 8.56%                                     | 4.78                     | <0.001               |
| Family                  | <i>f__Veillonellaceae</i>              | ↑                                  | 0.71%                                      | 3.29%                                     | 4.64                     | <0.001               |
| Family                  | <i>f__Ruminococcaceae</i>              | ↑                                  | 0.25%                                      | 1.04%                                     | 4.17                     | <0.001               |
| Family                  | <i>f__Streptococcaceae</i>             | ↑                                  | 1.62%                                      | 6.30%                                     | 3.88                     | <0.001               |
| Family                  | <i>f__unknown_Bacteria</i>             | ↑                                  | 2.17%                                      | 8.06%                                     | 3.71                     | <0.001               |
| Family                  | <i>f__Micrococcaceae</i>               | ↑                                  | 0.41%                                      | 1.50%                                     | 3.63                     | <0.001               |
| Family                  | <i>f__Pasteurellaceae</i>              | ↑                                  | 1.93%                                      | 5.23%                                     | 2.71                     | <0.001               |
| Genus                   | <i>g__unknown_Neisseriaceae</i>        | ↑                                  | 0.21%                                      | 1.88%                                     | 9.09                     | <0.001               |

|        |                                   |   |        |        |      |        |
|--------|-----------------------------------|---|--------|--------|------|--------|
| Genus  | <i>g__Staphylococcus</i>          | ↑ | 1.58%  | 10.99% | 6.97 | <0.001 |
| Genus  | <i>g__Corynebacterium</i>         | ↑ | 0.38%  | 2.61%  | 6.82 | <0.001 |
| Genus  | <i>g__Fusobacterium</i>           | ↑ | 0.51%  | 3.34%  | 6.56 | <0.001 |
| Genus  | <i>g__Bacteroides</i>             | ↑ | 0.42%  | 2.28%  | 5.39 | <0.001 |
| Genus  | <i>g__Streptophyta</i>            | ↑ | 0.96%  | 5.10%  | 5.33 | 0.024  |
| Genus  | <i>g__unknown__Prevotellaceae</i> | ↑ | 0.41%  | 2.15%  | 5.28 | <0.001 |
| Genus  | <i>g__Prevotella</i>              | ↑ | 1.38%  | 7.27%  | 5.27 | <0.001 |
| Genus  | <i>g__Gemella</i>                 | ↑ | 0.24%  | 1.18%  | 5.00 | <0.001 |
| Genus  | <i>g__Porphyromonas</i>           | ↑ | 0.40%  | 1.96%  | 4.92 | <0.001 |
| Genus  | <i>g__Alloprevotella</i>          | ↑ | 0.33%  | 1.64%  | 4.91 | <0.001 |
| Genus  | <i>g__Veillonella</i>             | ↑ | 0.59%  | 2.56%  | 4.36 | <0.001 |
| Genus  | <i>g__Neisseria</i>               | ↑ | 1.58%  | 6.68%  | 4.22 | <0.001 |
| Genus  | <i>g__Streptococcus</i>           | ↑ | 1.59%  | 6.23%  | 3.92 | <0.001 |
| Genus  | <i>g__Rothia</i>                  | ↑ | 0.36%  | 1.35%  | 3.74 | <0.001 |
| Genus  | <i>g__unknown__Bacteria</i>       | ↑ | 2.17%  | 8.06%  | 3.71 | <0.001 |
| Genus  | <i>g__Haemophilus</i>             | ↑ | 1.67%  | 4.24%  | 2.54 | <0.001 |
| Phylum | <i>p__Proteobacteria</i>          | ↓ | 83.92% | 28.15% | 0.34 | <0.001 |
| Class  | <i>c__Epsilonproteobacteria</i>   | ↓ | 77.38% | 10.11% | 0.13 | <0.001 |
| Order  | <i>o__Campylobacteriales</i>      | ↓ | 77.38% | 10.11% | 0.13 | <0.001 |
| Family | <i>f__Helicobacteraceae</i>       | ↓ | 77.33% | 9.67%  | 0.13 | <0.001 |
| Genus  | <i>g__Helicobacter</i>            | ↓ | 77.33% | 9.66%  | 0.12 | <0.001 |

**Stool samples**

|        |                                    |   |        |        |      |        |
|--------|------------------------------------|---|--------|--------|------|--------|
| Phylum | <i>p__Firmicutes</i>               | ↑ | 62.38% | 70.13% | 1.12 | 0.046  |
| Class  | <i>c__Clostridia</i>               | ↑ | 57.39% | 65.55% | 1.14 | 0.039  |
| Order  | <i>o__Bifidobacteriales</i>        | ↑ | 1.40%  | 2.60%  | 1.86 | 0.025  |
| Order  | <i>o__Clostridiales</i>            | ↑ | 57.11% | 65.38% | 1.14 | 0.038  |
| Family | <i>f__Peptostreptococcaceae</i>    | ↑ | 0.71%  | 2.21%  | 3.10 | 0.025  |
| Family | <i>f__Bifidobacteriaceae</i>       | ↑ | 1.40%  | 2.60%  | 1.86 | 0.025  |
| Genus  | <i>g__Anaerostipes</i>             | ↑ | 0.52%  | 1.83%  | 3.53 | <0.001 |
| Genus  | <i>g__Escherichia/Shigella</i>     | ↑ | 0.63%  | 1.94%  | 3.09 | 0.039  |
| Genus  | <i>g__Clostridium XI</i>           | ↑ | 0.63%  | 1.92%  | 3.03 | 0.025  |
| Genus  | <i>g__Bifidobacterium</i>          | ↑ | 1.37%  | 2.54%  | 1.85 | 0.025  |
| Genus  | <i>g__Fusicatenibacter</i>         | ↑ | 0.97%  | 1.46%  | 1.51 | 0.039  |
| Phylum | <i>p__Bacteroidetes</i>            | ↓ | 28.6%  | 18.95% | 0.66 | 0.002  |
| Class  | <i>c__Bacteroidia</i>              | ↓ | 28.57% | 18.88% | 0.66 | 0.002  |
| Order  | <i>o__Bacteroidales</i>            | ↓ | 28.57% | 18.88% | 0.66 | 0.002  |
| Family | <i>f__Rikenellaceae</i>            | ↓ | 1.07%  | 0.66%  | 0.62 | 0.025  |
| Genus  | <i>g__unknown__Ruminococcaceae</i> | ↓ | 3.71%  | 2.59%  | 0.70 | 0.048  |
| Genus  | <i>g__Alistipes</i>                | ↓ | 1.07%  | 0.66%  | 0.62 | 0.025  |

<sup>a</sup> The significantly changed taxa by successful eradication with mean relative abundances >1% were listed.

<sup>b</sup> The fold change was calculated as the ratio of the mean relative abundance after eradication to the mean relative abundance before eradication.

<sup>c</sup> Paired *t*-test after arcsine transformation of relative frequency and *q* values were used after adjustment for multiple comparison by the FDR.

Supplementary table 3. Significantly changed taxa after failed anti-*H. pylori* treatment

| Level                   | Taxa                      | Alteration trend after treatment | Mean relative abundance before treatment | Mean relative abundance after treatment | Fold change <sup>a</sup> | q value <sup>b</sup> |
|-------------------------|---------------------------|----------------------------------|------------------------------------------|-----------------------------------------|--------------------------|----------------------|
| <b>Gastric biopsies</b> |                           |                                  |                                          |                                         |                          |                      |
| None                    |                           |                                  |                                          |                                         |                          |                      |
| <b>Stool samples</b>    |                           |                                  |                                          |                                         |                          |                      |
| Class                   | <i>c__Bacilli</i>         | ↑                                | 0.41%                                    | 1.49%                                   | 3.64                     | 0.037                |
| Order                   | <i>o__Lactobacillales</i> | ↑                                | 0.41%                                    | 1.48%                                   | 3.63                     | 0.037                |
| Family                  | <i>f__Enterococcaceae</i> | ↑                                | <0.01%                                   | 0.11%                                   | 40.18                    | 0.025                |
| Genus                   | <i>g__Lactococcus</i>     | ↑                                | <0.01%                                   | 0.02%                                   | 62.37                    | 0.046                |
| Genus                   | <i>g__Enterococcus</i>    | ↑                                | <0.01%                                   | 0.11%                                   | 40.18                    | 0.025                |
| Genus                   | <i>g__Raoultella</i>      | ↑                                | <0.01%                                   | 0.01%                                   | 14.64                    | 0.025                |
| Genus                   | <i>g__Anaerostipes</i>    | ↑                                | 0.54%                                    | 1.41%                                   | 2.61                     | 0.017                |
| Genus                   | <i>g__Sutterella</i>      | ↓                                | 0.54%                                    | 0.22%                                   | 0.41                     | 0.046                |

<sup>a</sup> The fold change was calculated as the ratio of the mean relative abundance after treatment to the mean relative abundance before treatment.

<sup>b</sup> Paired *t*-test after arcsine transformation of relative frequency and q values were used after adjustment for multiple comparison by the FDR.

**Supplementary table 4. Significant changes in predicted metabolic pathways after anti-*H. pylori* treatment in gastric biopsies**

|                                                                   | Alteration trend after treatment | Mean relative frequency before treatment | Mean relative frequency after treatment | Fold change <sup>a</sup> | q value <sup>b</sup> |
|-------------------------------------------------------------------|----------------------------------|------------------------------------------|-----------------------------------------|--------------------------|----------------------|
| <b>Successful eradication group</b>                               |                                  |                                          |                                         |                          |                      |
| ko04974 Protein digestion and absorption                          | ↑                                | 1.86E-04                                 | 1.36E-03                                | 7.31                     | <0.001               |
| ko04640 Hematopoietic cell lineage                                | ↑                                | 2.68E-05                                 | 1.91E-04                                | 7.13                     | <0.001               |
| ko00531 Glycosaminoglycan degradation                             | ↑                                | 1.40E-04                                 | 9.69E-04                                | 6.91                     | <0.001               |
| ko00604 Glycosphingolipid biosynthesis - ganglio series           | ↑                                | 3.74E-05                                 | 2.51E-04                                | 6.71                     | <0.001               |
| ko04725 Cholinergic synapse                                       | ↑                                | 4.39E-06                                 | 2.94E-05                                | 6.71                     | <0.001               |
| ko00563 Glycosylphosphatidylinositol (GPI)-anchor biosynthesis    | ↑                                | 3.56E-06                                 | 2.38E-05                                | 6.68                     | <0.001               |
| ko00944 Flavone and flavonol biosynthesis                         | ↑                                | 7.57E-06                                 | 5.02E-05                                | 6.64                     | <0.001               |
| ko00511 Other glycan degradation                                  | ↑                                | 8.69E-04                                 | 5.69E-03                                | 6.55                     | <0.001               |
| ko04142 Lysosome                                                  | ↑                                | 1.77E-04                                 | 1.16E-03                                | 6.55                     | <0.001               |
| ko04064 NF-kappa B signaling pathway                              | ↑                                | 1.19E-08                                 | 7.80E-08                                | 6.51                     | <0.001               |
| ko05140 Leishmaniasis                                             | ↑                                | 1.19E-08                                 | 7.80E-08                                | 6.51                     | <0.001               |
| ko00603 Glycosphingolipid biosynthesis - globo series             | ↑                                | 7.41E-05                                 | 4.81E-04                                | 6.49                     | <0.001               |
| ko04614 Renin-angiotensin system                                  | ↑                                | 4.76E-05                                 | 3.09E-04                                | 6.48                     | <0.001               |
| ko04960 Aldosterone-regulated sodium reabsorption                 | ↑                                | 5.36E-06                                 | 3.43E-05                                | 6.40                     | <0.001               |
| ko04970 Salivary secretion                                        | ↑                                | 5.36E-06                                 | 3.43E-05                                | 6.40                     | <0.001               |
| ko04971 Gastric acid secretion                                    | ↑                                | 5.36E-06                                 | 3.43E-05                                | 6.40                     | <0.001               |
| ko04961 Endocrine and other factor-regulated calcium reabsorption | ↑                                | 5.45E-06                                 | 3.45E-05                                | 6.32                     | <0.001               |
| ko04972 Pancreatic secretion                                      | ↑                                | 5.64E-06                                 | 3.49E-05                                | 6.20                     | <0.001               |
| ko04973 Carbohydrate digestion and absorption                     | ↑                                | 1.20E-04                                 | 7.44E-04                                | 6.19                     | <0.001               |
| ko00940 Phenylpropanoid biosynthesis                              | ↑                                | 1.49E-04                                 | 9.07E-04                                | 6.11                     | <0.001               |
| ko00943 Isoflavonoid biosynthesis                                 | ↑                                | 1.99E-06                                 | 1.21E-05                                | 6.07                     | <0.001               |
| ko03460 Fanconi anemia pathway                                    | ↑                                | 4.48E-06                                 | 2.66E-05                                | 5.93                     | <0.001               |
| ko04930 Type II diabetes mellitus                                 | ↑                                | 3.42E-05                                 | 1.98E-04                                | 5.79                     | <0.001               |
| ko00785 Lipoic acid metabolism                                    | ↑                                | 2.52E-04                                 | 1.43E-03                                | 5.69                     | <0.001               |
| ko05202 Transcriptional misregulation in cancer                   | ↑                                | 2.47E-07                                 | 1.38E-06                                | 5.60                     | <0.001               |
| ko05203 Viral carcinogenesis                                      | ↑                                | 3.69E-05                                 | 2.07E-04                                | 5.60                     | <0.001               |
| ko00121 Secondary bile acid biosynthesis                          | ↑                                | 3.12E-05                                 | 1.74E-04                                | 5.57                     | <0.001               |
| ko04370 VEGF signaling pathway                                    | ↑                                | 4.89E-07                                 | 2.72E-06                                | 5.57                     | <0.001               |
| ko05143 African trypanosomiasis                                   | ↑                                | 6.36E-05                                 | 3.52E-04                                | 5.53                     | <0.001               |
| ko04011 MAPK signaling pathway - yeast                            | ↑                                | 6.14E-05                                 | 3.38E-04                                | 5.50                     | <0.001               |
| ko00522 Biosynthesis of 12-, 14- and 16-membered macrolides       | ↑                                | 3.39E-05                                 | 1.86E-04                                | 5.48                     | <0.001               |
| ko04920 Adipocytokine signaling pathway                           | ↑                                | 1.16E-04                                 | 6.35E-04                                | 5.48                     | <0.001               |
| ko00120 Primary bile acid biosynthesis                            | ↑                                | 3.70E-05                                 | 2.02E-04                                | 5.46                     | <0.001               |
| ko00941 Flavonoid biosynthesis                                    | ↑                                | 7.47E-06                                 | 4.08E-05                                | 5.45                     | <0.001               |
| ko04976 Bile secretion                                            | ↑                                | 1.05E-05                                 | 5.70E-05                                | 5.44                     | <0.001               |
| ko03022 Basal transcription factors                               | ↑                                | 1.96E-05                                 | 1.06E-04                                | 5.43                     | <0.001               |
| ko04622 RIG-I-like receptor signaling pathway                     | ↑                                | 2.03E-05                                 | 1.10E-04                                | 5.40                     | <0.001               |
| ko05219 Bladder cancer                                            | ↑                                | 1.40E-05                                 | 7.51E-05                                | 5.35                     | <0.001               |
| ko05142 Chagas disease (American trypanosomiasis)                 | ↑                                | 3.40E-05                                 | 1.79E-04                                | 5.26                     | <0.001               |
| ko05100 Bacterial invasion of epithelial cells                    | ↑                                | 3.55E-04                                 | 1.85E-03                                | 5.21                     | <0.001               |
| ko02060 Phosphotransferase system (PTS)                           | ↑                                | 1.50E-03                                 | 7.67E-03                                | 5.13                     | <0.001               |

|                                                                 |   |          |          |      |        |
|-----------------------------------------------------------------|---|----------|----------|------|--------|
| ko05222 Small cell lung cancer                                  | ↑ | 1.42E-06 | 7.21E-06 | 5.08 | <0.001 |
| ko05145 Toxoplasmosis                                           | ↑ | 8.17E-07 | 4.14E-06 | 5.07 | <0.001 |
| ko00909 Sesquiterpenoid and triterpenoid biosynthesis           | ↑ | 2.28E-05 | 1.15E-04 | 5.06 | <0.001 |
| ko00600 Sphingolipid metabolism                                 | ↑ | 3.63E-04 | 1.82E-03 | 5.00 | <0.001 |
| ko01054 Nonribosomal peptide structures                         | ↑ | 3.56E-04 | 1.77E-03 | 4.99 | <0.001 |
| ko05150 Staphylococcus aureus infection                         | ↑ | 6.23E-04 | 3.07E-03 | 4.94 | <0.001 |
| ko00311 Penicillin and cephalosporin biosynthesis               | ↑ | 1.39E-04 | 6.79E-04 | 4.89 | <0.001 |
| ko04916 Melanogenesis                                           | ↑ | 4.90E-07 | 2.40E-06 | 4.89 | <0.001 |
| ko00100 Steroid biosynthesis                                    | ↑ | 4.12E-06 | 2.00E-05 | 4.86 | <0.001 |
| ko01057 Biosynthesis of type II polyketide products             | ↑ | 1.43E-05 | 6.94E-05 | 4.85 | <0.001 |
| ko00945 Stilbenoid, diarylheptanoid and gingerol biosynthesis   | ↑ | 2.96E-05 | 1.43E-04 | 4.83 | <0.001 |
| ko04512 ECM-receptor interaction                                | ↑ | 1.96E-06 | 9.46E-06 | 4.82 | <0.001 |
| ko04510 Focal adhesion                                          | ↑ | 1.97E-06 | 9.46E-06 | 4.80 | <0.001 |
| ko05410 Hypertrophic cardiomyopathy (HCM)                       | ↑ | 2.93E-06 | 1.38E-05 | 4.73 | <0.001 |
| ko04113 Meiosis - yeast                                         | ↑ | 1.23E-04 | 5.81E-04 | 4.72 | <0.001 |
| ko00472 D-Arginine and D-ornithine metabolism                   | ↑ | 7.44E-06 | 3.47E-05 | 4.66 | <0.001 |
| ko04020 Calcium signaling pathway                               | ↑ | 1.25E-06 | 5.82E-06 | 4.65 | <0.001 |
| ko05110 Vibrio cholerae infection                               | ↑ | 3.55E-05 | 1.65E-04 | 4.65 | <0.001 |
| ko00364 Fluorobenzoate degradation                              | ↑ | 3.50E-05 | 1.59E-04 | 4.53 | <0.001 |
| ko03320 PPAR signaling pathway                                  | ↑ | 2.39E-04 | 1.08E-03 | 4.53 | <0.001 |
| ko00980 Metabolism of xenobiotics by cytochrome P450            | ↑ | 8.92E-05 | 4.03E-04 | 4.52 | <0.001 |
| ko04310 Wnt signaling pathway                                   | ↑ | 8.44E-07 | 3.80E-06 | 4.49 | <0.001 |
| ko04330 Notch signaling pathway                                 | ↑ | 8.44E-07 | 3.80E-06 | 4.49 | <0.001 |
| ko05220 Chronic myeloid leukemia                                | ↑ | 8.44E-07 | 3.80E-06 | 4.49 | <0.001 |
| ko00982 Drug metabolism - cytochrome P450                       | ↑ | 9.03E-05 | 4.06E-04 | 4.49 | <0.001 |
| ko04666 Fc gamma R-mediated phagocytosis                        | ↑ | 2.50E-06 | 1.11E-05 | 4.44 | <0.001 |
| ko00965 Betalain biosynthesis                                   | ↑ | 1.34E-06 | 5.93E-06 | 4.43 | <0.001 |
| ko00312 beta-Lactam resistance                                  | ↑ | 1.49E-04 | 6.55E-04 | 4.41 | <0.001 |
| ko00984 Steroid degradation                                     | ↑ | 5.52E-05 | 2.41E-04 | 4.36 | <0.001 |
| ko00232 Caffeine metabolism                                     | ↑ | 7.48E-06 | 3.25E-05 | 4.35 | <0.001 |
| ko04728 Dopaminergic synapse                                    | ↑ | 2.14E-06 | 9.17E-06 | 4.29 | <0.001 |
| ko05030 Cocaine addiction                                       | ↑ | 1.68E-06 | 7.19E-06 | 4.28 | <0.001 |
| ko05031 Amphetamine addiction                                   | ↑ | 1.69E-06 | 7.19E-06 | 4.25 | <0.001 |
| ko05204 Chemical carcinogenesis                                 | ↑ | 5.18E-05 | 2.19E-04 | 4.23 | <0.001 |
| ko00053 Ascorbate and aldarate metabolism                       | ↑ | 4.78E-04 | 2.02E-03 | 4.23 | <0.001 |
| ko00361 Chlorocyclohexane and chlorobenzene degradation         | ↑ | 1.47E-04 | 6.17E-04 | 4.20 | <0.001 |
| ko04726 Serotonergic synapse                                    | ↑ | 1.86E-06 | 7.82E-06 | 4.20 | <0.001 |
| ko05034 Alcoholism                                              | ↑ | 4.28E-06 | 1.79E-05 | 4.19 | <0.001 |
| ko04144 Endocytosis                                             | ↑ | 2.00E-06 | 8.34E-06 | 4.17 | <0.001 |
| ko04912 GnRH signaling pathway                                  | ↑ | 2.00E-06 | 8.34E-06 | 4.17 | <0.001 |
| ko00660 C5-Branched dibasic acid metabolism                     | ↑ | 4.00E-04 | 1.67E-03 | 4.16 | <0.001 |
| ko05020 Prion diseases                                          | ↑ | 7.61E-06 | 3.12E-05 | 4.10 | <0.001 |
| ko00500 Starch and sucrose metabolism                           | ↑ | 4.23E-03 | 1.73E-02 | 4.08 | <0.001 |
| ko05133 Pertussis                                               | ↑ | 1.50E-03 | 5.93E-03 | 3.94 | <0.001 |
| ko00510 N-Glycan biosynthesis                                   | ↑ | 2.95E-04 | 1.16E-03 | 3.94 | <0.001 |
| ko01053 Biosynthesis of siderophore group nonribosomal peptides | ↑ | 3.22E-04 | 1.24E-03 | 3.86 | <0.001 |
| ko00523 Polyketide sugar unit biosynthesis                      | ↑ | 3.73E-04 | 1.44E-03 | 3.86 | <0.001 |
| ko00902 Monoterpenoid biosynthesis                              | ↑ | 2.37E-06 | 9.02E-06 | 3.81 | <0.001 |

|                                                                    |   |          |          |      |        |
|--------------------------------------------------------------------|---|----------|----------|------|--------|
| ko03450 Non-homologous end-joining                                 | ↑ | 2.95E-05 | 1.11E-04 | 3.77 | <0.001 |
| ko05210 Colorectal cancer                                          | ↑ | 5.38E-07 | 2.00E-06 | 3.73 | <0.001 |
| ko05416 Viral myocarditis                                          | ↑ | 5.38E-07 | 2.00E-06 | 3.73 | <0.001 |
| ko00331 Clavulanic acid biosynthesis                               | ↑ | 4.96E-07 | 1.83E-06 | 3.69 | <0.001 |
| ko00906 Carotenoid biosynthesis                                    | ↑ | 1.97E-04 | 7.01E-04 | 3.55 | <0.001 |
| ko04610 Complement and coagulation cascades                        | ↑ | 2.73E-06 | 9.45E-06 | 3.46 | <0.001 |
| ko05131 Shigellosis                                                | ↑ | 4.32E-05 | 1.45E-04 | 3.35 | <0.001 |
| ko00830 Retinol metabolism                                         | ↑ | 1.10E-04 | 3.62E-04 | 3.29 | <0.001 |
| ko00071 Fatty acid metabolism                                      | ↑ | 6.18E-04 | 2.02E-03 | 3.27 | <0.001 |
| ko00281 Geraniol degradation                                       | ↑ | 4.59E-04 | 1.47E-03 | 3.21 | <0.001 |
| ko00901 Indole alkaloid biosynthesis                               | ↑ | 9.15E-07 | 2.91E-06 | 3.18 | <0.001 |
| ko01056 Biosynthesis of type II polyketide backbone                | ↑ | 8.57E-06 | 2.70E-05 | 3.15 | <0.001 |
| ko05322 Systemic lupus erythematosus                               | ↑ | 2.03E-06 | 6.38E-06 | 3.14 | <0.001 |
| ko00626 Naphthalene degradation                                    | ↑ | 3.71E-04 | 1.15E-03 | 3.10 | <0.001 |
| ko00040 Pentose and glucuronate interconversions                   | ↑ | 1.64E-03 | 4.72E-03 | 2.88 | <0.001 |
| ko05130 Pathogenic Escherichia coli infection                      | ↑ | 1.81E-05 | 5.09E-05 | 2.81 | <0.001 |
| ko00052 Galactose metabolism                                       | ↑ | 3.08E-03 | 8.32E-03 | 2.70 | <0.001 |
| ko00351 DDT degradation                                            | ↑ | 1.98E-05 | 5.27E-05 | 2.66 | <0.001 |
| ko01055 Biosynthesis of vancomycin group antibiotics               | ↑ | 1.93E-04 | 5.02E-04 | 2.60 | <0.001 |
| ko04910 Insulin signaling pathway                                  | ↑ | 3.72E-04 | 9.67E-04 | 2.60 | <0.001 |
| ko00521 Streptomycin biosynthesis                                  | ↑ | 9.45E-04 | 2.44E-03 | 2.58 | <0.001 |
| ko05168 Herpes simplex infection                                   | ↑ | 9.50E-07 | 2.40E-06 | 2.53 | <0.001 |
| ko00960 Tropane, piperidine and pyridine alkaloid biosynthesis     | ↑ | 3.36E-04 | 8.49E-04 | 2.52 | <0.001 |
| ko00363 Bisphenol degradation                                      | ↑ | 7.02E-04 | 1.70E-03 | 2.42 | <0.001 |
| ko00627 Aminobenzoate degradation                                  | ↑ | 1.28E-03 | 3.08E-03 | 2.41 | <0.001 |
| ko00140 Steroid hormone biosynthesis                               | ↑ | 2.19E-04 | 5.21E-04 | 2.38 | <0.001 |
| ko00562 Inositol phosphate metabolism                              | ↑ | 8.30E-04 | 1.97E-03 | 2.37 | <0.001 |
| ko05032 Morphine addiction                                         | ↑ | 1.13E-05 | 2.68E-05 | 2.37 | <0.001 |
| ko00532 Glycosaminoglycan biosynthesis - chondroitin sulfate       | ↑ | 1.01E-04 | 2.26E-04 | 2.25 | <0.001 |
| ko00601 Glycosphingolipid biosynthesis - lacto and neolacto series | ↑ | 2.56E-05 | 5.71E-05 | 2.23 | <0.001 |
| ko00591 Linoleic acid metabolism                                   | ↑ | 4.70E-04 | 1.03E-03 | 2.19 | <0.001 |
| ko04080 Neuroactive ligand-receptor interaction                    | ↑ | 2.98E-07 | 6.41E-07 | 2.15 | <0.001 |
| ko00565 Ether lipid metabolism                                     | ↑ | 9.03E-05 | 1.92E-04 | 2.13 | <0.001 |
| ko03050 Proteasome                                                 | ↑ | 3.79E-05 | 8.00E-05 | 2.11 | <0.001 |
| ko00903 Limonene and pinene degradation                            | ↑ | 7.62E-04 | 1.60E-03 | 2.11 | <0.001 |
| ko00362 Benzoate degradation                                       | ↑ | 1.62E-03 | 3.37E-03 | 2.08 | <0.001 |
| ko03040 Spliceosome                                                | ↑ | 1.13E-05 | 2.27E-05 | 2.01 | <0.001 |
| ko00650 Butanoate metabolism                                       | ↑ | 3.16E-03 | 6.19E-03 | 1.96 | <0.001 |
| ko00290 Valine, leucine and isoleucine biosynthesis                | ↑ | 2.26E-03 | 4.35E-03 | 1.93 | <0.001 |
| ko00920 Sulfur metabolism                                          | ↑ | 1.84E-03 | 3.52E-03 | 1.92 | <0.001 |
| ko04723 Retrograde endocannabinoid signaling                       | ↑ | 6.30E-05 | 1.17E-04 | 1.85 | <0.001 |
| ko03013 RNA transport                                              | ↑ | 1.32E-03 | 2.24E-03 | 1.70 | <0.001 |
| ko00360 Phenylalanine metabolism                                   | ↑ | 2.36E-03 | 3.98E-03 | 1.69 | <0.001 |
| ko00625 Chloroalkane and chloroalkene degradation                  | ↑ | 1.31E-03 | 2.05E-03 | 1.56 | <0.001 |
| ko00622 Xylene degradation                                         | ↑ | 2.40E-04 | 3.72E-04 | 1.55 | <0.001 |
| ko00621 Dioxin degradation                                         | ↑ | 2.19E-04 | 3.39E-04 | 1.54 | <0.001 |
| ko00340 Histidine metabolism                                       | ↑ | 5.44E-03 | 8.05E-03 | 1.48 | <0.001 |
| ko00010 Glycolysis / Gluconeogenesis                               | ↑ | 6.89E-03 | 1.00E-02 | 1.45 | <0.001 |

|                                                                |   |          |          |      |        |
|----------------------------------------------------------------|---|----------|----------|------|--------|
| ko02010 ABC transporters                                       | ↑ | 5.74E-02 | 8.12E-02 | 1.41 | <0.001 |
| ko00670 One carbon pool by folate                              | ↑ | 3.95E-03 | 5.58E-03 | 1.41 | <0.001 |
| ko00310 Lysine degradation                                     | ↑ | 2.77E-03 | 3.91E-03 | 1.41 | <0.001 |
| ko04141 Protein processing in endoplasmic reticulum            | ↑ | 4.08E-04 | 5.62E-04 | 1.38 | <0.001 |
| ko05111 Vibrio cholerae pathogenic cycle                       | ↑ | 2.14E-03 | 2.93E-03 | 1.37 | <0.001 |
| ko00460 Cyanoamino acid metabolism                             | ↑ | 1.42E-03 | 1.91E-03 | 1.35 | <0.001 |
| ko00051 Fructose and mannose metabolism                        | ↑ | 1.13E-02 | 1.52E-02 | 1.35 | <0.001 |
| ko00280 Valine, leucine and isoleucine degradation             | ↑ | 3.04E-03 | 4.08E-03 | 1.34 | <0.001 |
| ko00440 Phosphonate and phosphinate metabolism                 | ↑ | 9.07E-04 | 1.21E-03 | 1.34 | <0.001 |
| ko00710 Carbon fixation in photosynthetic organisms            | ↑ | 3.42E-03 | 4.57E-03 | 1.33 | <0.001 |
| ko05132 Salmonella infection                                   | ↑ | 1.05E-03 | 1.39E-03 | 1.33 | <0.001 |
| ko04621 NOD-like receptor signaling pathway                    | ↑ | 3.61E-04 | 4.77E-04 | 1.32 | <0.001 |
| ko00524 Butirosin and neomycin biosynthesis                    | ↑ | 2.18E-04 | 2.87E-04 | 1.31 | <0.001 |
| ko00473 D-Alanine metabolism                                   | ↑ | 2.44E-03 | 3.09E-03 | 1.27 | <0.001 |
| ko04514 Cell adhesion molecules (CAMs)                         | ↑ | 6.60E-09 | 8.37E-09 | 1.27 | <0.001 |
| ko05412 Arrhythmogenic right ventricular cardiomyopathy (ARVC) | ↑ | 6.60E-09 | 8.37E-09 | 1.27 | <0.001 |
| ko05414 Dilated cardiomyopathy                                 | ↑ | 6.60E-09 | 8.37E-09 | 1.27 | <0.001 |
| ko01051 Biosynthesis of ansamycins                             | ↑ | 9.85E-04 | 1.23E-03 | 1.25 | <0.001 |
| ko00950 Isoquinoline alkaloid biosynthesis                     | ↑ | 1.86E-04 | 2.31E-04 | 1.25 | <0.001 |
| ko01040 Biosynthesis of unsaturated fatty acids                | ↑ | 1.16E-03 | 1.41E-03 | 1.22 | <0.001 |
| ko00260 Glycine, serine and threonine metabolism               | ↑ | 1.06E-02 | 1.27E-02 | 1.20 | <0.001 |
| ko00983 Drug metabolism - other enzymes                        | ↑ | 3.16E-03 | 3.78E-03 | 1.20 | <0.001 |
| ko00760 Nicotinate and nicotinamide metabolism                 | ↑ | 7.07E-03 | 8.23E-03 | 1.16 | <0.001 |
| ko00196 Photosynthesis - antenna proteins                      | ↑ | 4.84E-07 | 5.61E-07 | 1.16 | <0.001 |
| ko00230 Purine metabolism                                      | ↑ | 3.39E-02 | 3.92E-02 | 1.16 | <0.001 |
| ko00640 Propanoate metabolism                                  | ↑ | 3.85E-03 | 4.42E-03 | 1.15 | <0.001 |
| ko00620 Pyruvate metabolism                                    | ↑ | 1.09E-02 | 1.25E-02 | 1.15 | <0.001 |
| ko05340 Primary immunodeficiency                               | ↑ | 4.72E-04 | 5.38E-04 | 1.14 | <0.001 |
| ko00480 Glutathione metabolism                                 | ↑ | 6.48E-03 | 7.33E-03 | 1.13 | <0.001 |
| ko02020 Two-component system                                   | ↑ | 4.35E-02 | 4.91E-02 | 1.13 | <0.001 |
| ko04724 Glutamatergic synapse                                  | ↑ | 2.94E-04 | 3.30E-04 | 1.12 | <0.001 |
| ko00350 Tyrosine metabolism                                    | ↑ | 4.58E-03 | 5.14E-03 | 1.12 | <0.001 |
| ko04964 Proximal tubule bicarbonate reclamation                | ↑ | 1.15E-04 | 1.28E-04 | 1.11 | <0.001 |
| ko00450 Selenocompound metabolism                              | ↑ | 4.87E-03 | 5.39E-03 | 1.11 | <0.001 |
| ko03008 Ribosome biogenesis in eukaryotes                      | ↑ | 8.24E-04 | 9.10E-04 | 1.10 | <0.001 |
| ko00730 Thiamine metabolism                                    | ↑ | 6.65E-03 | 7.32E-03 | 1.10 | <0.001 |
| ko00520 Amino sugar and nucleotide sugar metabolism            | ↑ | 2.01E-02 | 2.21E-02 | 1.10 | <0.001 |
| ko04978 Mineral absorption                                     | ↑ | 3.27E-04 | 3.60E-04 | 1.10 | <0.001 |
| ko00550 Peptidoglycan biosynthesis                             | ↑ | 1.71E-02 | 1.87E-02 | 1.10 | <0.001 |
| ko00561 Glycerolipid metabolism                                | ↑ | 5.19E-03 | 5.68E-03 | 1.09 | <0.001 |
| ko03440 Homologous recombination                               | ↑ | 1.56E-02 | 1.70E-02 | 1.09 | <0.001 |
| ko00380 Tryptophan metabolism                                  | ↑ | 1.29E-03 | 1.40E-03 | 1.09 | <0.001 |
| ko00720 Carbon fixation pathways in prokaryotes                | ↑ | 8.78E-03 | 9.44E-03 | 1.08 | <0.001 |
| ko00860 Porphyrin and chlorophyll metabolism                   | ↑ | 1.69E-02 | 1.80E-02 | 1.07 | <0.001 |
| ko00908 Zeatin biosynthesis                                    | ↑ | 1.11E-03 | 1.18E-03 | 1.06 | <0.001 |
| ko00020 Citrate cycle (TCA cycle)                              | ↑ | 5.72E-03 | 6.05E-03 | 1.06 | <0.001 |
| ko04146 Peroxisome                                             | ↑ | 1.78E-03 | 1.88E-03 | 1.06 | <0.001 |
| ko03018 RNA degradation                                        | ↑ | 1.51E-02 | 1.58E-02 | 1.05 | <0.001 |
| ko00250 Alanine, aspartate and glutamate metabolism            | ↑ | 1.18E-02 | 1.23E-02 | 1.04 | <0.001 |



|                                                             |   |          |          |      |        |
|-------------------------------------------------------------|---|----------|----------|------|--------|
| ko00770 Pantothenate and CoA biosynthesis                   | ↓ | 7.84E-03 | 7.72E-03 | 0.99 | <0.001 |
| ko04070 Phosphatidylinositol signaling system               | ↓ | 7.66E-04 | 7.48E-04 | 0.98 | <0.001 |
| ko00061 Fatty acid biosynthesis                             | ↓ | 7.87E-03 | 7.60E-03 | 0.97 | <0.001 |
| ko00240 Pyrimidine metabolism                               | ↓ | 3.04E-02 | 2.94E-02 | 0.97 | <0.001 |
| ko00910 Nitrogen metabolism                                 | ↓ | 1.64E-02 | 1.57E-02 | 0.96 | <0.001 |
| ko05152 Tuberculosis                                        | ↓ | 1.95E-03 | 1.85E-03 | 0.95 | <0.001 |
| ko04626 Plant-pathogen interaction                          | ↓ | 2.90E-03 | 2.75E-03 | 0.95 | <0.001 |
| ko00750 Vitamin B6 metabolism                               | ↓ | 3.84E-03 | 3.62E-03 | 0.94 | <0.001 |
| ko00642 Ethylbenzene degradation                            | ↓ | 1.09E-03 | 1.03E-03 | 0.94 | <0.001 |
| ko00930 Caprolactam degradation                             | ↓ | 6.22E-04 | 5.88E-04 | 0.94 | <0.001 |
| ko00564 Glycerophospholipid metabolism                      | ↓ | 1.04E-02 | 9.83E-03 | 0.94 | <0.001 |
| ko00130 Ubiquinone and other terpenoid-quinone biosynthesis | ↓ | 6.94E-03 | 6.54E-03 | 0.94 | <0.001 |
| ko00401 Novobiocin biosynthesis                             | ↓ | 8.05E-04 | 7.57E-04 | 0.94 | <0.001 |
| ko00680 Methane metabolism                                  | ↓ | 1.29E-02 | 1.20E-02 | 0.94 | <0.001 |
| ko00630 Glyoxylate and dicarboxylate metabolism             | ↓ | 9.50E-03 | 8.84E-03 | 0.93 | <0.001 |
| ko05010 Alzheimers disease                                  | ↓ | 1.19E-03 | 1.09E-03 | 0.91 | <0.001 |
| ko03030 DNA replication                                     | ↓ | 8.94E-03 | 8.13E-03 | 0.91 | <0.001 |
| ko00643 Styrene degradation                                 | ↓ | 4.73E-04 | 4.28E-04 | 0.90 | <0.001 |
| ko03420 Nucleotide excision repair                          | ↓ | 1.58E-02 | 1.43E-02 | 0.90 | <0.001 |
| ko00072 Synthesis and degradation of ketone bodies          | ↓ | 4.93E-04 | 4.39E-04 | 0.89 | <0.001 |
| ko00270 Cysteine and methionine metabolism                  | ↓ | 1.44E-02 | 1.27E-02 | 0.88 | <0.001 |
| ko00300 Lysine biosynthesis                                 | ↓ | 1.23E-02 | 1.08E-02 | 0.88 | <0.001 |
| ko00330 Arginine and proline metabolism                     | ↓ | 1.91E-02 | 1.67E-02 | 0.88 | <0.001 |
| ko03060 Protein export                                      | ↓ | 9.61E-03 | 8.36E-03 | 0.87 | <0.001 |
| ko04940 Type I diabetes mellitus                            | ↓ | 5.26E-04 | 4.56E-04 | 0.87 | <0.001 |
| ko00970 Aminoacyl-tRNA biosynthesis                         | ↓ | 4.65E-02 | 3.98E-02 | 0.86 | <0.001 |
| ko03010 Ribosome                                            | ↓ | 2.87E-02 | 2.45E-02 | 0.85 | <0.001 |
| ko00471 D-Glutamine and D-glutamate metabolism              | ↓ | 2.83E-03 | 2.39E-03 | 0.84 | <0.001 |
| ko00900 Terpenoid backbone biosynthesis                     | ↓ | 1.32E-02 | 1.11E-02 | 0.84 | <0.001 |
| ko00190 Oxidative phosphorylation                           | ↓ | 1.89E-02 | 1.56E-02 | 0.83 | <0.001 |
| ko00430 Taurine and hypotaurine metabolism                  | ↓ | 1.84E-03 | 1.50E-03 | 0.82 | <0.001 |
| ko00195 Photosynthesis                                      | ↓ | 4.11E-03 | 3.26E-03 | 0.79 | <0.001 |
| ko00740 Riboflavin metabolism                               | ↓ | 6.16E-03 | 4.88E-03 | 0.79 | <0.001 |
| ko03020 RNA polymerase                                      | ↓ | 3.71E-03 | 2.91E-03 | 0.78 | <0.001 |
| ko00400 Phenylalanine, tyrosine and tryptophan biosynthesis | ↓ | 1.69E-02 | 1.29E-02 | 0.77 | <0.001 |
| ko04112 Cell cycle - Caulobacter                            | ↓ | 1.92E-02 | 1.45E-02 | 0.76 | <0.001 |
| ko00780 Biotin metabolism                                   | ↓ | 8.37E-03 | 6.17E-03 | 0.74 | <0.001 |
| ko04122 Sulfur relay system                                 | ↓ | 6.75E-03 | 4.96E-03 | 0.73 | <0.001 |
| ko00790 Folate biosynthesis                                 | ↓ | 1.02E-02 | 7.46E-03 | 0.73 | <0.001 |
| ko00062 Fatty acid elongation                               | ↓ | 2.95E-05 | 2.17E-05 | 0.73 | <0.001 |
| ko00624 Polycyclic aromatic hydrocarbon degradation         | ↓ | 3.78E-03 | 2.64E-03 | 0.70 | <0.001 |
| ko05146 Amoebiasis                                          | ↓ | 5.08E-04 | 3.44E-04 | 0.68 | <0.001 |
| ko00253 Tetracycline biosynthesis                           | ↓ | 7.15E-04 | 4.48E-04 | 0.63 | <0.001 |
| ko00791 Atrazine degradation                                | ↓ | 1.58E-03 | 9.82E-04 | 0.62 | <0.001 |
| ko04210 Apoptosis                                           | ↓ | 9.42E-04 | 5.70E-04 | 0.61 | <0.001 |
| ko05200 Pathways in cancer                                  | ↓ | 7.33E-04 | 4.35E-04 | 0.59 | <0.001 |
| ko05211 Renal cell carcinoma                                | ↓ | 4.16E-04 | 2.45E-04 | 0.59 | <0.001 |
| ko04721 Synaptic vesicle cycle                              | ↓ | 2.26E-05 | 1.31E-05 | 0.58 | <0.001 |
| ko04962 Vasopressin-regulated water reabsorption            | ↓ | 2.26E-05 | 1.31E-05 | 0.58 | <0.001 |

|                                                                    |   |          |          |      |        |
|--------------------------------------------------------------------|---|----------|----------|------|--------|
| ko05215 Prostate cancer                                            | ↓ | 3.15E-04 | 1.82E-04 | 0.58 | <0.001 |
| ko04612 Antigen processing and presentation                        | ↓ | 3.14E-04 | 1.78E-04 | 0.57 | <0.001 |
| ko04914 Progesterone-mediated oocyte maturation                    | ↓ | 3.14E-04 | 1.78E-04 | 0.57 | <0.001 |
| ko00540 Lipopolysaccharide biosynthesis                            | ↓ | 2.05E-02 | 1.17E-02 | 0.57 | <0.001 |
| ko05016 Huntingtons disease                                        | ↓ | 8.81E-04 | 4.87E-04 | 0.55 | <0.001 |
| ko03070 Bacterial secretion system                                 | ↓ | 2.82E-02 | 1.54E-02 | 0.55 | <0.001 |
| ko00633 Nitrotoluene degradation                                   | ↓ | 3.60E-03 | 1.82E-03 | 0.50 | <0.001 |
| ko02030 Bacterial chemotaxis                                       | ↓ | 1.21E-02 | 6.05E-03 | 0.50 | <0.001 |
| ko05134 Legionellosis                                              | ↓ | 6.87E-03 | 3.43E-03 | 0.50 | <0.001 |
| ko05012 Parkinsons disease                                         | ↓ | 4.10E-04 | 1.93E-04 | 0.47 | <0.001 |
| ko05014 Amyotrophic lateral sclerosis (ALS)                        | ↓ | 5.73E-04 | 2.61E-04 | 0.46 | <0.001 |
| ko03015 mRNA surveillance pathway                                  | ↓ | 8.27E-05 | 3.49E-05 | 0.42 | <0.001 |
| ko04115 p53 signaling pathway                                      | ↓ | 1.11E-05 | 4.57E-06 | 0.41 | <0.001 |
| ko04260 Cardiac muscle contraction                                 | ↓ | 3.47E-04 | 1.37E-04 | 0.39 | <0.001 |
| ko00592 alpha-Linolenic acid metabolism                            | ↓ | 6.43E-04 | 2.23E-04 | 0.35 | <0.001 |
| ko02040 Flagellar assembly                                         | ↓ | 3.32E-02 | 9.38E-03 | 0.28 | <0.001 |
| ko05120 Epithelial cell signaling in Helicobacter pylori infection | ↓ | 6.01E-02 | 1.28E-02 | 0.21 | <0.001 |
| ko04975 Fat digestion and absorption                               | ↓ | 2.97E-05 | 5.76E-06 | 0.19 | <0.001 |

**Failed treatment group**

None

<sup>a</sup> The fold change was calculated as the ratio of the mean relative frequency after treatment to the mean relative frequency before treatment.

<sup>b</sup> Paired *t*-test after arcsine transformation of relative frequency and *q* values were used after adjustment for multiple comparison by the FDR.

**Supplementary table 5. Significant changes in predicted metabolic pathways after anti-*H. pylori* treatment in stool samples**

|                                                              | Alteration trend after treatment | Mean relative frequency before treatment | Mean relative frequency after treatment | Fold change <sup>a</sup> | q value <sup>b</sup> |
|--------------------------------------------------------------|----------------------------------|------------------------------------------|-----------------------------------------|--------------------------|----------------------|
| <b>Successful eradication group</b>                          |                                  |                                          |                                         |                          |                      |
| ko05145 Toxoplasmosis                                        | ↑                                | 1.18E-06                                 | 2.01E-06                                | 1.71                     | 0.033                |
| ko00062 Fatty acid elongation                                | ↑                                | 6.25E-06                                 | 9.73E-06                                | 1.56                     | <0.001               |
| ko05160 Hepatitis C                                          | ↑                                | 1.35E-07                                 | 1.96E-07                                | 1.45                     | 0.036                |
| ko05162 Measles                                              | ↑                                | 1.35E-07                                 | 1.96E-07                                | 1.45                     | 0.036                |
| ko01057 Biosynthesis of type II polyketide products          | ↑                                | 2.38E-05                                 | 3.00E-05                                | 1.26                     | 0.003                |
| ko03040 Spliceosome                                          | ↑                                | 2.70E-05                                 | 3.37E-05                                | 1.25                     | 0.025                |
| ko03450 Non-homologous end-joining                           | ↑                                | 5.92E-05                                 | 7.15E-05                                | 1.21                     | 0.015                |
| ko05034 Alcoholism                                           | ↑                                | 6.25E-06                                 | 7.50E-06                                | 1.20                     | 0.037                |
| ko05100 Bacterial invasion of epithelial cells               | ↑                                | 1.03E-03                                 | 1.23E-03                                | 1.19                     | 0.049                |
| ko05143 African trypanosomiasis                              | ↑                                | 4.41E-04                                 | 5.25E-04                                | 1.19                     | <0.001               |
| ko05150 Staphylococcus aureus infection                      | ↑                                | 1.17E-03                                 | 1.38E-03                                | 1.17                     | 0.022                |
| ko00984 Steroid degradation                                  | ↑                                | 6.76E-05                                 | 7.87E-05                                | 1.16                     | 0.042                |
| ko00253 Tetracycline biosynthesis                            | ↑                                | 2.05E-04                                 | 2.36E-04                                | 1.15                     | 0.017                |
| ko00072 Synthesis and degradation of ketone bodies           | ↑                                | 2.02E-04                                 | 2.31E-04                                | 1.14                     | 0.016                |
| ko02010 ABC transporters                                     | ↑                                | 7.78E-02                                 | 8.57E-02                                | 1.10                     | 0.006                |
| ko00791 Atrazine degradation                                 | ↑                                | 6.00E-04                                 | 6.54E-04                                | 1.09                     | 0.032                |
| ko00473 D-Alanine metabolism                                 | ↑                                | 3.84E-03                                 | 4.17E-03                                | 1.08                     | 0.006                |
| ko04910 Insulin signaling pathway                            | ↑                                | 1.66E-03                                 | 1.78E-03                                | 1.07                     | 0.017                |
| ko00450 Selenocompound metabolism                            | ↑                                | 5.18E-03                                 | 5.42E-03                                | 1.05                     | 0.009                |
| ko00401 Novobiocin biosynthesis                              | ↑                                | 7.18E-04                                 | 7.49E-04                                | 1.04                     | 0.022                |
| ko00030 Pentose phosphate pathway                            | ↑                                | 7.77E-03                                 | 8.00E-03                                | 1.03                     | 0.019                |
| ko00400 Phenylalanine, tyrosine and tryptophan biosynthesis  | ↑                                | 1.26E-02                                 | 1.29E-02                                | 1.03                     | 0.010                |
| ko00620 Pyruvate metabolism                                  | ↓                                | 1.06E-02                                 | 1.04E-02                                | 0.98                     | 0.025                |
| ko00190 Oxidative phosphorylation                            | ↓                                | 1.62E-02                                 | 1.58E-02                                | 0.97                     | 0.015                |
| ko00260 Glycine, serine and threonine metabolism             | ↓                                | 1.20E-02                                 | 1.17E-02                                | 0.97                     | 0.010                |
| ko00650 Butanoate metabolism                                 | ↓                                | 5.67E-03                                 | 5.47E-03                                | 0.96                     | 0.019                |
| ko00591 Linoleic acid metabolism                             | ↓                                | 1.13E-03                                 | 1.09E-03                                | 0.96                     | 0.026                |
| ko00910 Nitrogen metabolism                                  | ↓                                | 1.47E-02                                 | 1.41E-02                                | 0.96                     | 0.027                |
| ko00520 Amino sugar and nucleotide sugar metabolism          | ↓                                | 2.86E-02                                 | 2.73E-02                                | 0.95                     | 0.015                |
| ko05200 Pathways in cancer                                   | ↓                                | 3.76E-04                                 | 3.58E-04                                | 0.95                     | 0.048                |
| ko04727 GABAergic synapse                                    | ↓                                | 5.44E-04                                 | 5.16E-04                                | 0.95                     | 0.036                |
| ko00532 Glycosaminoglycan biosynthesis - chondroitin sulfate | ↓                                | 4.22E-04                                 | 3.98E-04                                | 0.94                     | 0.042                |
| ko00051 Fructose and mannose metabolism                      | ↓                                | 1.98E-02                                 | 1.87E-02                                | 0.94                     | 0.006                |
| ko00020 Citrate cycle (TCA cycle)                            | ↓                                | 4.73E-03                                 | 4.45E-03                                | 0.94                     | 0.044                |
| ko00430 Taurine and hypotaurine metabolism                   | ↓                                | 8.73E-04                                 | 8.18E-04                                | 0.94                     | 0.025                |
| ko00280 Valine, leucine and isoleucine degradation           | ↓                                | 2.79E-03                                 | 2.61E-03                                | 0.94                     | 0.030                |
| ko00521 Streptomycin biosynthesis                            | ↓                                | 3.37E-03                                 | 3.14E-03                                | 0.93                     | 0.009                |
| ko00780 Biotin metabolism                                    | ↓                                | 4.90E-03                                 | 4.55E-03                                | 0.93                     | 0.031                |
| ko00523 Polyketide sugar unit biosynthesis                   | ↓                                | 2.36E-03                                 | 2.19E-03                                | 0.93                     | 0.006                |
| ko04612 Antigen processing and presentation                  | ↓                                | 2.21E-04                                 | 2.05E-04                                | 0.93                     | 0.026                |
| ko04914 Progesterone-mediated oocyte maturation              | ↓                                | 2.21E-04                                 | 2.05E-04                                | 0.93                     | 0.026                |
| ko01055 Biosynthesis of vancomycin group antibiotics         | ↓                                | 7.05E-04                                 | 6.55E-04                                | 0.93                     | 0.006                |
| ko00311 Penicillin and cephalosporin biosynthesis            | ↓                                | 5.33E-04                                 | 4.93E-04                                | 0.92                     | 0.025                |

|                                                             |   |          |          |      |       |
|-------------------------------------------------------------|---|----------|----------|------|-------|
| ko04621 NOD-like receptor signaling pathway                 | ↓ | 5.70E-04 | 5.17E-04 | 0.91 | 0.034 |
| ko05215 Prostate cancer                                     | ↓ | 2.48E-04 | 2.25E-04 | 0.91 | 0.010 |
| ko00130 Ubiquinone and other terpenoid-quinone biosynthesis | ↓ | 4.48E-03 | 4.05E-03 | 0.90 | 0.033 |
| ko00460 Cyanoamino acid metabolism                          | ↓ | 3.05E-03 | 2.75E-03 | 0.90 | 0.019 |
| ko00440 Phosphonate and phosphinate metabolism              | ↓ | 1.07E-03 | 9.63E-04 | 0.90 | 0.036 |
| ko00511 Other glycan degradation                            | ↓ | 1.11E-02 | 9.87E-03 | 0.89 | 0.032 |
| ko00600 Sphingolipid metabolism                             | ↓ | 4.88E-03 | 4.33E-03 | 0.89 | 0.047 |
| ko00940 Phenylpropanoid biosynthesis                        | ↓ | 2.28E-03 | 2.02E-03 | 0.89 | 0.032 |
| ko04964 Proximal tubule bicarbonate reclamation             | ↓ | 8.54E-05 | 7.57E-05 | 0.89 | 0.030 |
| ko00830 Retinol metabolism                                  | ↓ | 2.63E-04 | 2.32E-04 | 0.88 | 0.032 |
| ko00785 Lipoic acid metabolism                              | ↓ | 1.33E-03 | 1.14E-03 | 0.86 | 0.022 |
| ko04113 Meiosis - yeast                                     | ↓ | 1.08E-03 | 9.09E-04 | 0.84 | 0.020 |
| ko00590 Arachidonic acid metabolism                         | ↓ | 3.26E-04 | 2.75E-04 | 0.84 | 0.017 |
| ko04210 Apoptosis                                           | ↓ | 7.53E-04 | 6.24E-04 | 0.83 | 0.001 |
| ko00540 Lipopolysaccharide biosynthesis                     | ↓ | 6.99E-03 | 5.77E-03 | 0.83 | 0.014 |
| ko04974 Protein digestion and absorption                    | ↓ | 2.19E-03 | 1.80E-03 | 0.82 | 0.034 |
| ko00364 Fluorobenzoate degradation                          | ↓ | 5.94E-05 | 4.86E-05 | 0.82 | 0.038 |
| ko04142 Lysosome                                            | ↓ | 2.97E-03 | 2.43E-03 | 0.82 | 0.026 |
| ko04723 Retrograde endocannabinoid signaling                | ↓ | 1.63E-04 | 1.32E-04 | 0.81 | 0.048 |
| ko00604 Glycosphingolipid biosynthesis - ganglio series     | ↓ | 5.90E-04 | 4.75E-04 | 0.80 | 0.015 |
| ko04310 Wnt signaling pathway                               | ↓ | 3.61E-06 | 2.90E-06 | 0.80 | 0.001 |
| ko04330 Notch signaling pathway                             | ↓ | 3.61E-06 | 2.90E-06 | 0.80 | 0.001 |
| ko05220 Chronic myeloid leukemia                            | ↓ | 3.61E-06 | 2.90E-06 | 0.80 | 0.001 |
| ko05410 Hypertrophic cardiomyopathy (HCM)                   | ↓ | 9.99E-06 | 7.86E-06 | 0.79 | 0.009 |
| ko00531 Glycosaminoglycan degradation                       | ↓ | 2.48E-03 | 1.94E-03 | 0.78 | 0.009 |
| ko00140 Steroid hormone biosynthesis                        | ↓ | 8.71E-04 | 6.81E-04 | 0.78 | 0.019 |
| ko05322 Systemic lupus erythematosus                        | ↓ | 1.43E-05 | 1.06E-05 | 0.74 | 0.036 |
| ko03015 mRNA surveillance pathway                           | ↓ | 4.13E-05 | 2.98E-05 | 0.72 | 0.006 |
| <b>Failed treatment group</b>                               |   |          |          |      |       |
| ko00902 Monoterpenoid biosynthesis                          | ↑ | 7.01E-08 | 2.88E-07 | 4.11 | 0.006 |
| ko04916 Melanogenesis                                       | ↑ | 6.66E-09 | 2.28E-08 | 3.38 | 0.018 |
| ko00513 Various types of N-glycan biosynthesis              | ↑ | 8.99E-06 | 2.11E-05 | 2.35 | 0.032 |
| ko05210 Colorectal cancer                                   | ↑ | 1.07E-07 | 2.37E-07 | 2.21 | 0.032 |
| ko05416 Viral myocarditis                                   | ↑ | 1.07E-07 | 2.37E-07 | 2.21 | 0.032 |
| ko05110 Vibrio cholerae infection                           | ↑ | 6.68E-06 | 1.24E-05 | 1.85 | 0.049 |
| ko00909 Sesquiterpenoid and triterpenoid biosynthesis       | ↑ | 3.48E-06 | 6.03E-06 | 1.73 | 0.032 |
| ko00901 Indole alkaloid biosynthesis                        | ↑ | 3.17E-07 | 5.28E-07 | 1.66 | 0.036 |
| ko04115 p53 signaling pathway                               | ↑ | 4.89E-07 | 8.10E-07 | 1.66 | 0.032 |
| ko05145 Toxoplasmosis                                       | ↑ | 8.90E-07 | 1.46E-06 | 1.64 | 0.024 |
| ko05168 Herpes simplex infection                            | ↑ | 2.65E-07 | 4.06E-07 | 1.53 | 0.032 |
| ko00592 alpha-Linolenic acid metabolism                     | ↑ | 3.89E-05 | 5.80E-05 | 1.49 | 0.019 |
| ko00062 Fatty acid elongation                               | ↑ | 5.52E-06 | 7.62E-06 | 1.38 | 0.020 |
| ko05014 Amyotrophic lateral sclerosis (ALS)                 | ↑ | 4.60E-05 | 6.31E-05 | 1.37 | 0.040 |
| ko00984 Steroid degradation                                 | ↑ | 5.67E-05 | 7.58E-05 | 1.34 | 0.018 |
| ko04512 ECM-receptor interaction                            | ↑ | 5.65E-06 | 7.52E-06 | 1.33 | 0.024 |
| ko04510 Focal adhesion                                      | ↑ | 5.66E-06 | 7.52E-06 | 1.33 | 0.024 |
| ko05100 Bacterial invasion of epithelial cells              | ↑ | 9.71E-04 | 1.28E-03 | 1.31 | 0.022 |
| ko00643 Styrene degradation                                 | ↑ | 8.89E-05 | 1.11E-04 | 1.25 | 0.026 |
| ko00351 DDT degradation                                     | ↑ | 2.48E-05 | 3.09E-05 | 1.24 | 0.019 |

|                                                               |   |          |          |      |       |
|---------------------------------------------------------------|---|----------|----------|------|-------|
| ko00380 Tryptophan metabolism                                 | ↑ | 3.94E-04 | 4.82E-04 | 1.22 | 0.027 |
| ko05222 Small cell lung cancer                                | ↑ | 4.21E-06 | 5.01E-06 | 1.19 | 0.029 |
| ko00253 Tetracycline biosynthesis                             | ↑ | 1.89E-04 | 2.22E-04 | 1.17 | 0.018 |
| ko05016 Huntingtons disease                                   | ↑ | 2.02E-04 | 2.33E-04 | 1.15 | 0.036 |
| ko00072 Synthesis and degradation of ketone bodies            | ↑ | 1.84E-04 | 2.11E-04 | 1.15 | 0.024 |
| ko00791 Atrazine degradation                                  | ↑ | 5.84E-04 | 6.49E-04 | 1.11 | 0.027 |
| ko00945 Stilbenoid, diarylheptanoid and gingerol biosynthesis | ↑ | 5.62E-05 | 6.21E-05 | 1.10 | 0.033 |
| ko00361 Chlorocyclohexane and chlorobenzene degradation       | ↑ | 3.67E-04 | 4.01E-04 | 1.10 | 0.019 |
| ko01040 Biosynthesis of unsaturated fatty acids               | ↑ | 7.93E-04 | 8.66E-04 | 1.09 | 0.032 |
| ko00626 Naphthalene degradation                               | ↑ | 8.33E-04 | 8.93E-04 | 1.07 | 0.027 |
| ko00450 Selenocompound metabolism                             | ↑ | 5.09E-03 | 5.40E-03 | 1.06 | 0.019 |
| ko00030 Pentose phosphate pathway                             | ↑ | 7.47E-03 | 7.87E-03 | 1.05 | 0.019 |
| ko00564 Glycerophospholipid metabolism                        | ↑ | 8.47E-03 | 8.79E-03 | 1.04 | 0.032 |
| ko00627 Aminobenzoate degradation                             | ↑ | 2.38E-03 | 2.43E-03 | 1.02 | 0.044 |
| ko00500 Starch and sucrose metabolism                         | ↓ | 3.04E-02 | 2.91E-02 | 0.96 | 0.027 |
| ko00051 Fructose and mannose metabolism                       | ↓ | 2.02E-02 | 1.91E-02 | 0.95 | 0.019 |
| ko01055 Biosynthesis of vancomycin group antibiotics          | ↓ | 7.10E-04 | 6.72E-04 | 0.95 | 0.032 |
| ko00521 Streptomycin biosynthesis                             | ↓ | 3.39E-03 | 3.19E-03 | 0.94 | 0.032 |
| ko04724 Glutamatergic synapse                                 | ↓ | 4.98E-04 | 4.68E-04 | 0.94 | 0.032 |
| ko00523 Polyketide sugar unit biosynthesis                    | ↓ | 2.36E-03 | 2.21E-03 | 0.94 | 0.027 |
| ko00532 Glycosaminoglycan biosynthesis - chondroitin sulfate  | ↓ | 4.23E-04 | 3.95E-04 | 0.93 | 0.049 |
| ko04973 Carbohydrate digestion and absorption                 | ↓ | 1.20E-03 | 1.09E-03 | 0.91 | 0.027 |
| ko04978 Mineral absorption                                    | ↓ | 3.34E-04 | 3.04E-04 | 0.91 | 0.032 |
| ko04210 Apoptosis                                             | ↓ | 7.87E-04 | 6.95E-04 | 0.88 | 0.032 |
| ko04310 Wnt signaling pathway                                 | ↓ | 3.97E-06 | 3.45E-06 | 0.87 | 0.032 |
| ko04330 Notch signaling pathway                               | ↓ | 3.97E-06 | 3.45E-06 | 0.87 | 0.032 |
| ko05220 Chronic myeloid leukemia                              | ↓ | 3.97E-06 | 3.45E-06 | 0.87 | 0.032 |
| ko03015 mRNA surveillance pathway                             | ↓ | 4.53E-05 | 3.54E-05 | 0.78 | 0.020 |

<sup>a</sup>The fold change was calculated as the ratio of the mean relative frequency after treatment to the mean relative frequency before treatment.

<sup>b</sup>Paired *t*-test after arcsine transformation of relative frequency and *q* values were used after adjustment for multiple comparison by the FDR.

Supplementary table 6. Associations of differential gastric genera after *H. pylori* eradication with gastric lesions

| Differential gastric genera      | Normal/SG<br>n=32                                     | CAG<br>n=42                                           |                          |                  | IM/DYS<br>n=61                                        |                          |                  |
|----------------------------------|-------------------------------------------------------|-------------------------------------------------------|--------------------------|------------------|-------------------------------------------------------|--------------------------|------------------|
|                                  | Median of relative abundance<br>(Interquartile range) | Median of relative abundance<br>(Interquartile range) | OR (95% CI) <sup>a</sup> | <i>P</i>         | Median of relative abundance<br>(Interquartile range) | OR (95% CI) <sup>a</sup> | <i>P</i>         |
| <i>g__Alloprevotella</i>         | <b>0.90% (0.19%-2.78%)</b>                            | <b>0.09% (0.03%-0.68%)</b>                            | <b>0.60 (0.39-0.92)</b>  | <b>0.019</b>     | <b>0.11% (0.02%-0.58%)</b>                            | <b>0.71 (0.51-0.98)</b>  | <b>0.037</b>     |
| <i>g__Bacteroides</i>            | 0.33% (0.11%-0.66%)                                   | 0.13% (0.03%-0.50%)                                   | 0.40 (0.13-1.25)         | 0.115            | 0.15% (0.05%-0.63%)                                   | 0.95 (0.74-1.22)         | 0.700            |
| <i>g__Corynebacterium</i>        | 0.15% (0.03%-0.25%)                                   | 0.04% (0.01%-0.24%)                                   | 0.87 (0.62-1.24)         | 0.453            | 0.04% (0.02%-0.22%)                                   | 0.83 (0.53-1.30)         | 0.424            |
| <i>g__Fusobacterium</i>          | <b>1.95% (0.47%-4.39%)</b>                            | <b>0.18% (0.08%-0.86%)</b>                            | <b>0.58 (0.41-0.82)</b>  | <b>0.002</b>     | <b>0.28% (0.07%-1.2%)</b>                             | <b>0.68 (0.52-0.88)</b>  | <b>0.004</b>     |
| <i>g__Gemella</i>                | 0.53% (0.11%-0.89%)                                   | 0.09% (0.02%-0.50%)                                   | 0.49 (0.22-1.11)         | 0.088            | 0.12% (0.03%-0.55%)                                   | 0.61 (0.29-1.30)         | 0.201            |
| <i>g__Haemophilus</i>            | 3.81% (0.86%-6.88%)                                   | 0.47% (0.08%-1.76%)                                   | 0.83 (0.73-0.96)         | 0.009            | 0.65% (0.08%-2.53%)                                   | 0.91 (0.82-1.01)         | 0.064            |
| <i>g__Helicobacter</i>           | <b>2.26% (0.76%-16.01%)</b>                           | <b>90.09% (24.85%-96.62%)</b>                         | <b>1.03 (1.02-1.05)</b>  | <b>&lt;0.001</b> | <b>86.66% (29.47%-96.53%)</b>                         | <b>1.03 (1.01-1.04)</b>  | <b>&lt;0.001</b> |
| <i>g__Neisseria</i>              | <b>5.80% (0.98%-12.02%)</b>                           | <b>0.42% (0.13%-3.71%)</b>                            | <b>0.89 (0.82-0.97)</b>  | <b>0.006</b>     | <b>0.72% (0.14%-3.07%)</b>                            | <b>0.85 (0.77-0.94)</b>  | <b>0.001</b>     |
| <i>g__Porphyromonas</i>          | <b>1.65% (0.36%-3.04%)</b>                            | <b>0.19% (0.04%-0.73%)</b>                            | <b>0.63 (0.46-0.87)</b>  | <b>0.005</b>     | <b>0.23% (0.06%-0.9%)</b>                             | <b>0.58 (0.41-0.82)</b>  | <b>0.002</b>     |
| <i>g__Prevotella</i>             | <b>3.62% (1.57%-6.85%)</b>                            | <b>0.48% (0.17%-2.13%)</b>                            | <b>0.81 (0.69-0.95)</b>  | <b>0.009</b>     | <b>0.42% (0.15%-1.79%)</b>                            | <b>0.80 (0.68-0.93)</b>  | <b>0.004</b>     |
| <i>g__Rothia</i>                 | <b>1.25% (0.34%-2.38%)</b>                            | <b>0.09% (0.02%-0.62%)</b>                            | <b>0.40 (0.22-0.73)</b>  | <b>0.003</b>     | <b>0.16% (0.04%-0.92%)</b>                            | <b>0.44 (0.28-0.71)</b>  | <b>&lt;0.001</b> |
| <i>g__Staphylococcus</i>         | 0.15% (0.03%-0.24%)                                   | 0.04% (0.01%-0.26%)                                   | 1.53 (0.64-3.67)         | 0.337            | 0.04% (0.01%-0.18%)                                   | 1.24 (0.80-1.90)         | 0.336            |
| <i>g__Streptococcus</i>          | 3.67% (1.64%-7.59%)                                   | 0.49% (0.13%-3.38%)                                   | 0.79 (0.67-0.93)         | 0.004            | 1.00% (0.17%-2.79%)                                   | 0.93 (0.86-1.02)         | 0.110            |
| <i>g__Streptophyta</i>           | 0.41% (0.05%-1.25%)                                   | 0.05% (0.01%-0.52%)                                   | 0.88 (0.74-1.06)         | 0.191            | 0.32% (0.05%-0.84%)                                   | 0.96 (0.92-1.00)         | 0.072            |
| <i>g__unknown_Bacteria</i>       | <b>11.43% (3.39%-17.94%)</b>                          | <b>0.88% (0.33%-3.8%)</b>                             | <b>0.94 (0.89-0.99)</b>  | <b>0.020</b>     | <b>0.94% (0.43%-6.78%)</b>                            | <b>0.95 (0.90-0.99)</b>  | <b>0.025</b>     |
| <i>g__unknown_Neisseriaceae</i>  | 0.12% (0.03%-0.29%)                                   | 0.03% (0.00%-0.13%)                                   | 0.28 (0.05-1.73)         | 0.171            | 0.01% (0.00%-0.14%)                                   | 0.85 (0.25-2.86)         | 0.789            |
| <i>g__unknown_Prevotellaceae</i> | <b>1.32% (0.49%-2.17%)</b>                            | <b>0.14% (0.05%-0.8%)</b>                             | <b>0.54 (0.34-0.86)</b>  | <b>0.009</b>     | <b>0.13% (0.03%-0.59%)</b>                            | <b>0.64 (0.42-0.97)</b>  | <b>0.034</b>     |
| <i>g__Veillonella</i>            | <b>0.96% (0.21%-2.23%)</b>                            | <b>0.22% (0.04%-1.00%)</b>                            | <b>0.47 (0.28-0.79)</b>  | <b>0.005</b>     | <b>0.33% (0.06%-0.86%)</b>                            | <b>0.63 (0.42-0.95)</b>  | <b>0.028</b>     |

<sup>a</sup> Unconditional logistic regression adjusted for age and sex.

CAG, chronic atrophic gastritis; CI, confidence interval; DYS, dysplasia; IM, intestinal metaplasia; OR, odds ratio; SG, superficial gastritis

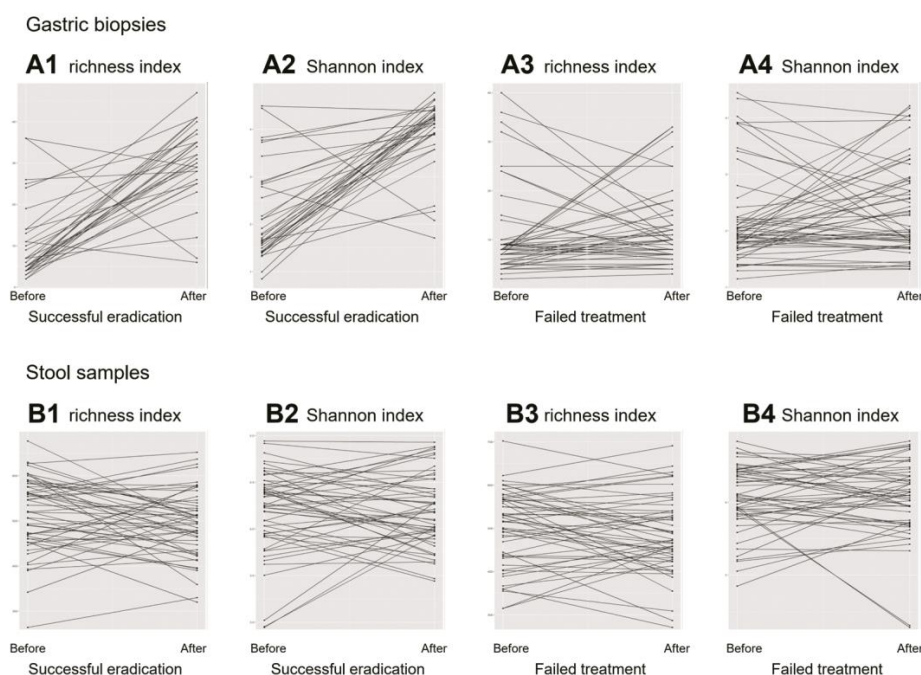

**Supplementary figure 1. The trends in gastrointestinal microbial diversity before and after anti-*H. pylori* treatment**

Paired plots showing alteration trends in (A1) gastric richness index before and after successful eradication; (A2) gastric Shannon index before and after successful eradication; (A3) gastric richness index before and after failed treatment; (A4) gastric Shannon index before and after failed treatment; (B1) fecal richness index before and after successful eradication; (B2) fecal Shannon index before and after successful eradication; (B3) fecal richness index before and after failed treatment; (B4) fecal Shannon index before and after failed treatment.

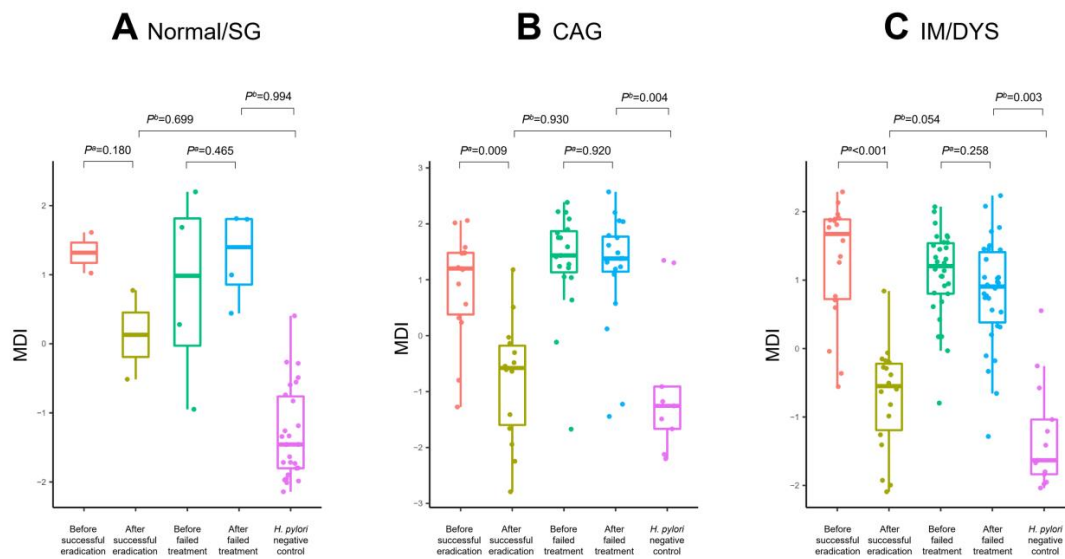

**Supplementary figure 2. Changes of gastric MDI after anti-*H. pylori* treatment by baseline gastric lesion**

Box plots showing decreased gastric MDI following successful eradication compared to that of baseline in groups of baseline (A) normal/SG, (B) CAG, and (C) IM/DYS.

<sup>a</sup>Wilcoxon signed-rank test

<sup>b</sup>Logistic regression adjusted for age and sex

SG, superficial gastritis; CAG, chronic atrophic gastritis; IM, intestinal metaplasia; DYS, dysplasia; MDI, microbial dysbiosis index
